# Supplementary material
Source: PubMed Central journal article supplement (PMC3151685)
Supplement: supp_M017376_jlr.M017376-1.pdf [file supp_M017376_jlr.M017376-1.pdf]

**Supplemental Table 1. Primer sequences for QPCR.**

| Genes   | Primer sequences                                                | Genes   | Primer sequences                                                 |
|---------|-----------------------------------------------------------------|---------|------------------------------------------------------------------|
| CD36    | 5'-CAGTCGGAGACATGCT-3'<br>5'-CTCGGGTCTCTGAGTT-3'                | HMGCR   | 5'-AGCTTGCCCGAATTGTATGTG-3'<br>5'-TCTGTTGTGAACCATGTGACTTC-3'     |
| SR-A    | 5'-GGAGTGTAGGCGGATC-3'<br>5'-GTCAATGGAGGCCCA-3'                 | LDLR    | 5'-TGACTCAGACGAACAAGGCTG-3'<br>5'-ATCTAGGCAATCTCGGTCTCC-3'       |
| SR-B1   | 5'-CTCATCAAGCAGCAGGTGCTCA-3'<br>5'-GAGGATTCGGGTGTCATGAA-3'      | Insig1  | 5'-TCACAGTGA CTGAGCTTCAGCA-3'<br>5'-TCATCTTCATCACACCCAGGAC-3'    |
| ABCA1   | 5'-CCGAGGAAGACGTGGACACCTTC-3'<br>5'-CCTCAGCCATGACCTGCCTTGTAG-3' | Insig2a | 5'-CCCTCAATGAATGTACTGAAGGATT-3'<br>5'-TGTGAAGTGAAGCAGACCAATGT-3' |
| ABCG1   | 5'-AGGTCTCAGCCTTCTAAAGTTCCTC-3'<br>5'-TCTCTCGAATGAAATTTATCG-3'  | Insig2b | 5'-CCGGGCAGAGCTCAGGAT-3'<br>5'-GAAGCAGACCAATGTTTCAATGG-3'        |
| SREBP1a | 5'-GCGCCATGGACGAGCTG-3'<br>5'-TTGGCACCTGGGCTGCT-3'              | CYP7A1  | 5'-TATGCCTTCTGCTACCGAGTG-3'<br>5'-CATGCGTAGACGGATCAGTTC-3'       |
| SREBP1c | 5'-GGAGCCATGGATTGCACATT-3'<br>5'-GCTTCCAGAGAGGAGGCCAG-3'        | ApoA1   | 5'-AAGAGGATGTGGAGCTCTACC-3'<br>5'-TTCTCGCCAAGTGTCTTCAGG-3'       |
| SREBP2  | 5'-GCGTTCTGGAGACCATGGA-3'<br>5'-ACAAAGTTGCTCTGAAAACAAATCA-3'    | ApoAIV  | 5'-CAGTGAGGAGCCCAGGATGTT-3'<br>5'-TCTACAGCTCCTTGGCATT-3'         |
| ABCG5   | 5'-TGCCCATTCCTTTAAAAATCC-3'<br>5'-GATGAACTGGACCCCTTGG-3'        | FXR     | 5'-TCCGGACATTCAACCATCAC-3'<br>5'-TCACTGCACATCCAGATCTC-3'         |
| ABCG8   | 5'-GTAGCTGATGCCGATGACAA-3'<br>5'-GGGGCTGATGCAGATTCA-3'          | GAPDH   | 5'-AACTTTGGCATTGTGGAAGG-3'<br>5'-GGATGCAGGGATGATGTTCT-3'         |

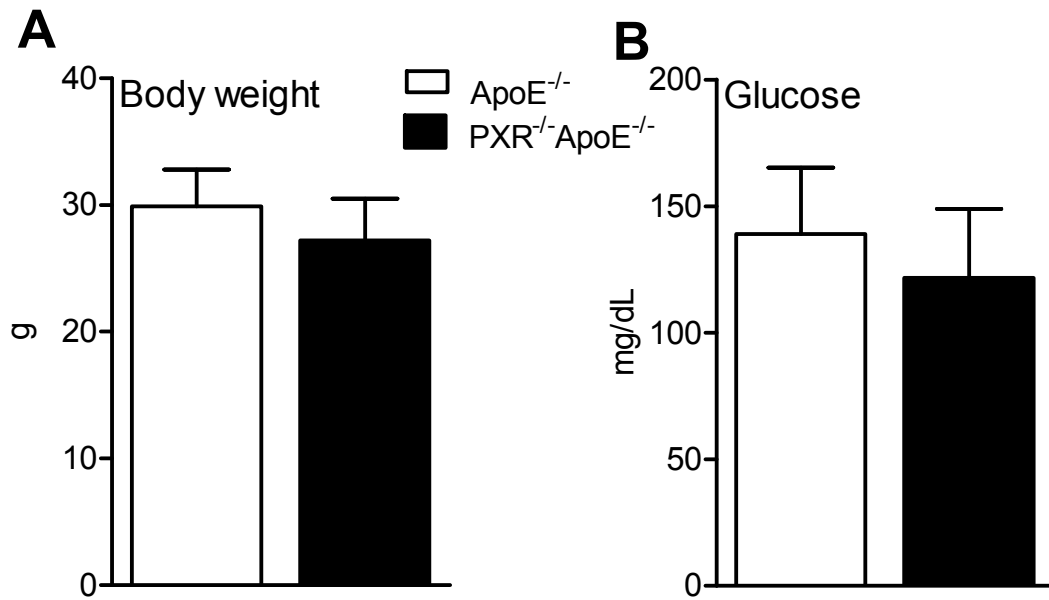

**Supplemental Figure 1.** Four week old of male ApoE<sup>-/-</sup> and PXR<sup>-/-</sup>ApoE<sup>-/-</sup> mice were fed a semi-synthetic 0.02% cholesterol AIN76a diet for 12 weeks. Body weight (A) and fasting blood glucose levels (B) were measured in mice at 16 weeks old (n=10-13 per group)

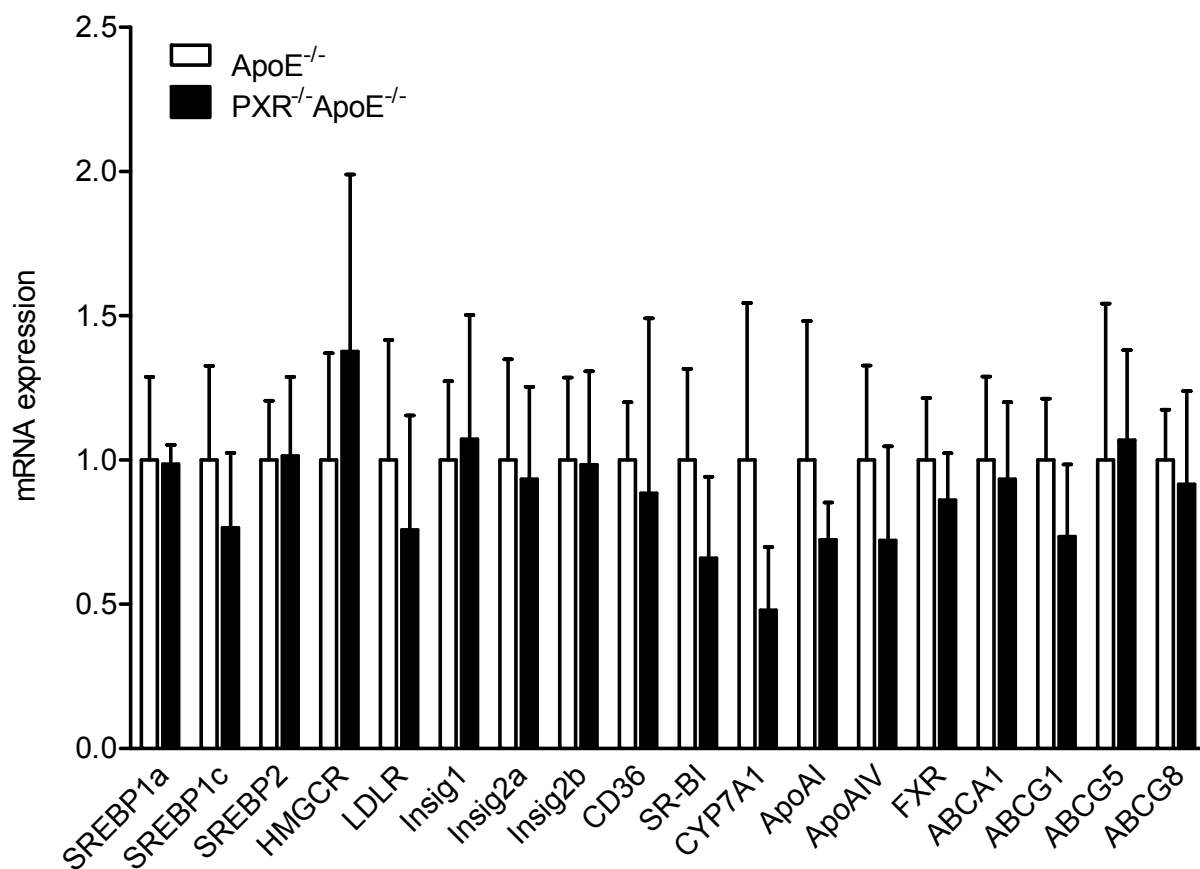

**Supplemental Figure 2.** Total RNA was isolated from the livers of 16 week old male ApoE<sup>-/-</sup> and PXR<sup>-/-</sup> ApoE<sup>-/-</sup> mice. The expression levels of hepatic genes involved in lipid homeostasis and other atherosclerosis related genes were measured by QPCR (n=5 per group).

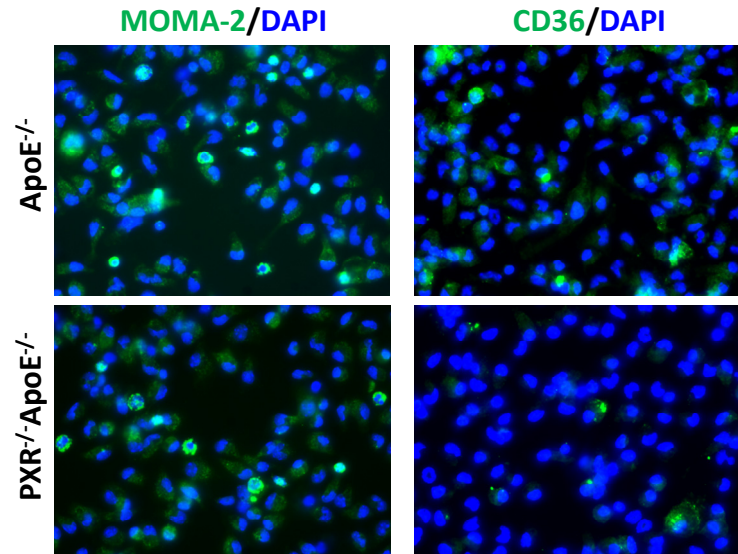

**Supplemental Figure 3.** Fresh isolated peritoneal macrophages from ApoE<sup>-/-</sup> and PXR<sup>-/-</sup>ApoE<sup>-/-</sup> mice were anti-monocytes/macrophages (MOMA-2) or anti-CD36 primary antibodies, followed by fluorescein-labeled secondary antibodies. The nuclei were stained with DAPI (blue). Magnification, ×400.
